# Supplementary material
Source: Springer Nature journal article supplement (https://www.springermedizin.de/resource/supplementary/12967_2010_660_MOESM6_ESM.pdf/9577230)

**Scg 2**      **Chga**      **Cav-1**      **Cav-2**      **Ascl 1**      **Igf-2**      **Foxa2**      **18S**

**1 2 3**    **1 2 3**    **1 2 3**    **1 2 3**    **1 2 3**    **1 2 3**    **1 2 3**    **1 2 3**    **M**

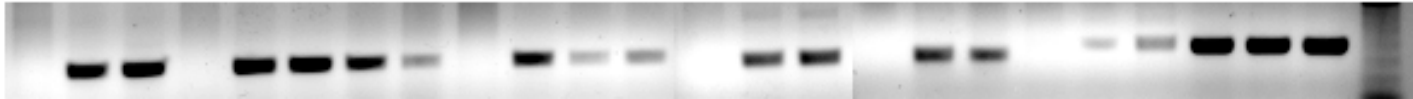

Supplement: MOESM6 [file 9577230]
